# Supplementary material
Source: publisher figshare collection journal article supplement (https://sage.figshare.com/ndownloader/files/18737120)
Supplement: Supplementary file 1 [file 18737120]

Reviewer 1 v.1

Comments to the Author

This is a well constructed, balanced meta-analysis.

My only minor comment is to slightly expand the discussion section focusing on clinical relevance. I suggest reading the editorial "Idiopathic Pulmonary Fibrosis and Emphysema: Between Scylla and Charybdis" (Respiration. 2016;92(4):215-217) and adding it in your references.
